# Supplementary material for: Protection of DNA by metal ions at 95 °C: from lower critical solution temperature (LCST) behavior to coordination-driven self-assembly
Source: Royal Society of Chemistry journal article supplement (doi:10.1039/d2nr03461a), 2022-01-01
Supplement: d2nr03461a1.pdf [file d2nr03461a1.pdf]

## Electronic supplementary information

### **Protection of DNA by metal ions at 95°C: from lower critical solution temperature (LCST) behavior to coordination-driven self-assembly**

Chang Lu<sup>1,2</sup>, Yuancong Xu<sup>2,3</sup>, Po-Jung Jimmy Huang<sup>2</sup>, Mohamad Zandieh<sup>2</sup>, Yihao Wang<sup>2</sup>,  
Jinkai Zheng<sup>1</sup> and Juewen Liu<sup>2,\*</sup>

1. Institute of Food Science and Technology, Chinese Academy of Agricultural Sciences, Beijing 100193, P. R. China
2. Department of Chemistry, Waterloo Institute for Nanotechnology, University of Waterloo, Waterloo, Ontario, Canada  
Email: liujw@uwaterloo.ca
3. Beijing Advanced Innovation Center for Food Nutrition and Human Health, College of Food Science & Nutritional Engineering, China Agricultural University, Beijing, China

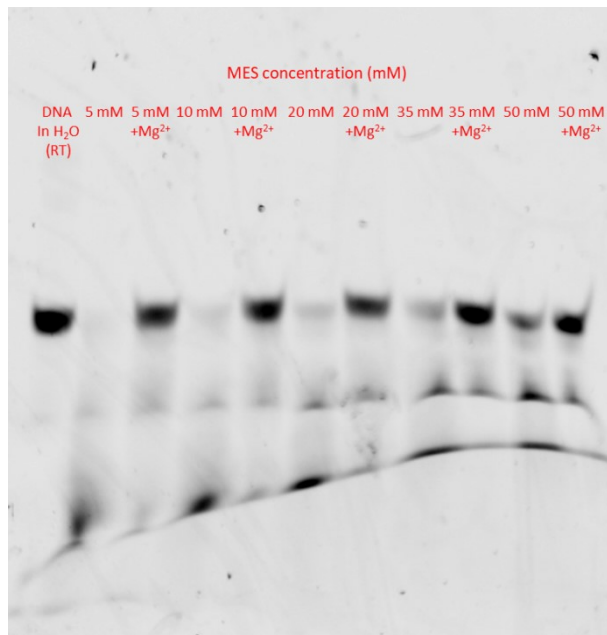

**Figure S1.** 200 nM FAM-DNA mixed with 3.8  $\mu\text{M}$  non-labeled DNA in different concentrations of MES buffer, pH 6.0 without or with 4 mM  $\text{Mg}^{2+}$  after heating at 95°C. After cooling to room temperature, 10  $\mu\text{L}$  of the sample was mixed with 10  $\mu\text{L}$  0.1 $\times$  loading dye in 8 M urea and 5 mM EDTA for dPAGE.

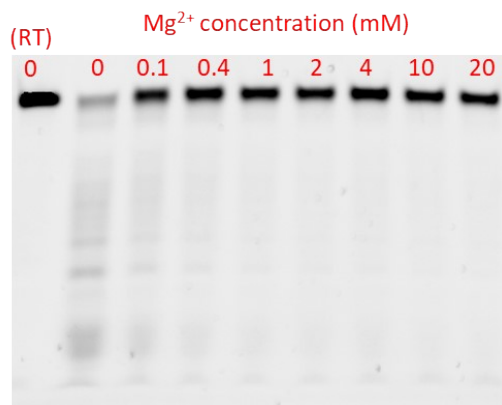

**Figure S2.** 1  $\mu\text{M}$  FAM-DNA mixed with 3  $\mu\text{M}$  non-labeled DNA in 5 mM MES, pH 6 with different concentrations of  $\text{Mg}^{2+}$  after heating at 95°C for 1 h. After cooling to room temperature, 2  $\mu\text{L}$  of the sample was mixed with 18  $\mu\text{L}$  0.1 $\times$  loading dye in 8 M urea and 5 mM EDTA for dPAGE. With a shorter heating time, the DNA was not fully degraded in the  $\text{Mg}^{2+}$ -free sample.

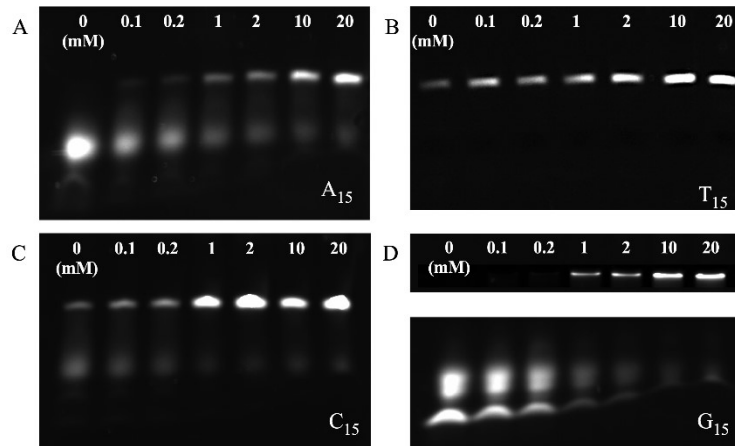

**Figure S3.** (A) FAM-A<sub>15</sub>, (B) FAM-T<sub>15</sub>, (C) FAM-C<sub>15</sub> and (D) FAM-G<sub>15</sub> mixed with different concentrations of Mg<sup>2+</sup> at 95°C for 3 h. The concentrations were 0.2 μM FAM-labeled DNA mixed with 3.8 μM non-labeled DNA, except for 0.4 FAM-labeled G<sub>15</sub> was used with 4 μM non-labeled G<sub>15</sub> due to its lower fluorescence.
